# Supplementary material
Source: Springer Nature journal article supplement (https://www.springermedizin.de/resource/supplementary/13601_2012_283_MOESM1_ESM.pdf/9677820)
Supplement: MOESM1 [file 9677820]

Sample of households  
n=17 698

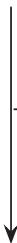

Subject unable to answer  
Refusals  
No answers  
Numbers not allocated

n=1 569  
n=6 028  
n=3 059  
n=1 39

Interviews  
n=6 003

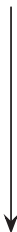

Lifetime asthma  
n=658

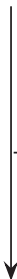

No wheezing, waking with  
breathlessness nor attack of  
asthma in last 12 months

n=280

Current asthma  
n=450
